# Supplementary material for: A Cr(iii) supramolecular network composite membrane with high water stability and proton conductivity
Source: Royal Society of Chemistry journal article supplement (doi:10.1039/d2ce01610a), 2023-01-01
Supplement: d2ce01610a1.pdf [file d2ce01610a1.pdf]

# Cr(III) supramolecular network composite membrane with high water stability and proton conductivity

Shu-Fang Zhou,<sup>a</sup> Hong-Jie Zhang,<sup>a</sup> Chen-Xi Zhang<sup>\*ab</sup> and Qing-Lun Wang<sup>\*cd</sup>

**Table S1.** The Crystallographic data for complex **1**

| Compound                                                     | <b>1</b>                                                                       |
|--------------------------------------------------------------|--------------------------------------------------------------------------------|
| Formula                                                      | C <sub>18</sub> H <sub>14</sub> Cr <sub>2</sub> N <sub>8</sub> O <sub>10</sub> |
| <i>Mr</i>                                                    | 606.36                                                                         |
| T/K                                                          | 113(2)                                                                         |
| Crystal system                                               | Monoclinic                                                                     |
| Space group                                                  | <i>P</i> 2 <sub>1</sub> / <i>c</i>                                             |
| <i>a</i> / Å                                                 | 7.2581(15)                                                                     |
| <i>b</i> / Å                                                 | 19.176(4)                                                                      |
| <i>c</i> / Å                                                 | 7.9267(16)                                                                     |
| $\alpha$ /°                                                  | 90                                                                             |
| $\beta$ /°                                                   | 102.24(3)                                                                      |
| $\gamma$ /°                                                  | 90                                                                             |
| <i>Z</i>                                                     | 2                                                                              |
| Volume /Å <sup>3</sup>                                       | 1078.2(4)                                                                      |
| $\rho$ /g cm <sup>-3</sup>                                   | 1.868                                                                          |
| $\mu$ /mm <sup>-1</sup>                                      | 1.087                                                                          |
| <i>F</i> (000)                                               | 612.0                                                                          |
| Crystal size /mm <sup>3</sup>                                | 0.20×0.18×0.12                                                                 |
| $2\theta$ /°                                                 | 2.836 to 27.786                                                                |
| Index ranges                                                 | -9 ≤ <i>h</i> ≤ 9<br>-25 ≤ <i>k</i> ≤ 25<br>-10 ≤ <i>l</i> ≤ 10                |
| Reflections collected                                        | 11829                                                                          |
| <i>R</i> <sub>(int)</sub>                                    | 0.0530                                                                         |
| Data/ restraints / parameters                                | 2550 / 0/ 172                                                                  |
| GOF on <i>F</i> <sup>2</sup>                                 | 1.230                                                                          |
| Final <i>R</i> indices [ <i>I</i> > 2 $\delta$ ( <i>I</i> )] | <i>R</i> <sub>1</sub> =0.0847, <i>wR</i> <sub>2</sub> =0.1656                  |
| <i>R</i> indices(all data)                                   | <i>R</i> <sub>1</sub> =0.0910, <i>wR</i> <sub>2</sub> =0.1686                  |

**Table S2.** Selected bond distances and angles for **1**

|                      |            |
|----------------------|------------|
| Cr(1)-O(9)           | 1.966(4)   |
| Cr(1)-O(2)           | 1.989(4)   |
| Cr(1)-N(1)           | 2.052(4)   |
| Cr(1)-O(9)#1         | 1.950(3)   |
| Cr(1)-O(3)#1         | 1.986(4)   |
| Cr(1)-N(4)#1         | 2.058(4)   |
| Cr(1)-Cr(1)#1        | 2.9754(18) |
| O(3)-Cr(1)#1         | 1.986(4)   |
| O(9)-Cr(1)#1         | 115.71(9)  |
| N(4)-Cr(1)#1         | 2.058(4)   |
| O(9)-Cr(1)-O(3)#1    | 94.98(15)  |
| O(2)-Cr(1)-N(4)#1    | 94.50(17)  |
| N(1)-Cr(1)-N(4)#1    | 167.93(18) |
| O(9)-Cr(1)-N(4)#1    | 92.55(16)  |
| O(9)#1-Cr(1)-O(9)    | 81.08(16)  |
| O(9)#1-Cr(1)-O(2)    | 94.59(16)  |
| O(3)#1-Cr(1)-O(2)    | 89.99(16)  |
| O(9)#1-Cr(1)-N(1)    | 95.71(16)  |
| O(3)#1-Cr(1)-N(1)    | 90.46(17)  |
| O(3)#1-Cr(1)-N(4)#1  | 79.10(16)  |
| O(9)#1-Cr(1)-O(3)#1  | 172.90(15) |
| O(9)#1-Cr(1)-N(4)#1  | 95.10(16)  |
| O(9)#1-Cr(1)-Cr(1)#1 | 40.74(11)  |

Symmetry transformations used to generate equivalent atoms:

#1 -x+2,-y,-z+1

**Table S3.** Comparison of the proton conductivity values of **1** with other proton conducting materials.

| Materials                                                                                                                       | Conductivity (S·cm <sup>-1</sup> ) <sup>1)</sup> | Conditions     | References |
|---------------------------------------------------------------------------------------------------------------------------------|--------------------------------------------------|----------------|------------|
| <b>1</b>                                                                                                                        | $1.03 \times 10^{-3}$                            | 367K, 98% RH   | This work  |
| Zn(o-H <sub>2</sub> BrPhIDC) <sub>2</sub> (H <sub>2</sub> O) <sub>2</sub> ·CH <sub>3</sub> CH <sub>2</sub> OH·3H <sub>2</sub> O | $1.14 \times 10^{-4}$                            | 373K, 98% RH   | 1s         |
| Co(o-H <sub>2</sub> BrPhIDC) <sub>2</sub> (H <sub>2</sub> O) <sub>2</sub> ·CH <sub>3</sub> CH <sub>2</sub> OH·3H <sub>2</sub> O | $3.11 \times 10^{-4}$                            | 373K, 98% RH   | 1s         |
| Mg(L)(H <sub>2</sub> O) <sub>5</sub> ·H <sub>2</sub> O]                                                                         | $5.87 \times 10^{-4}$                            | 343K, 75% RH   | 2s         |
| MHOF1                                                                                                                           | $7.50 \times 10^{-4}$                            | 353K, 98%RH    | 3s         |
| MHOF2                                                                                                                           | $3.50 \times 10^{-4}$                            | 353K, 98%RH    | 3s         |
| {(H <sub>3</sub> O)[Tb(BODSDC)-(H <sub>2</sub> O) <sub>2</sub> ]} <sub>n</sub>                                                  | $6.57 \times 10^{-4}$                            | 358K, 95% RH   | 4s         |
| [Cu <sub>12</sub> (MES) <sub>6</sub> (H <sub>2</sub> O) <sub>3</sub> ] <sub>n</sub>                                             | $3.63 \times 10^{-5}$                            | 333 K, 98% RH  | 5s         |
| {[Cu <sub>12</sub> (MPS) <sub>6</sub> (H <sub>2</sub> O) <sub>4</sub> ]·6H <sub>2</sub> O} <sub>n</sub>                         | $2.75 \times 10^{-5}$                            | 333 K, 98% RH  | 5s         |
| ICR-11                                                                                                                          | $4.26 \times 10^{-4}$                            | 350 K, 100% RH | 6s         |

**Table S4.** Comparison of the proton conductivity values of **1@CS/PVP-10** with other membranes.

| Materials                                                     | Conductivity (S·cm <sup>-1</sup> ) <sup>1)</sup> | Conditions   | References |
|---------------------------------------------------------------|--------------------------------------------------|--------------|------------|
| <b>1@CS/PVP-10</b>                                            | $8.64 \times 10^{-2}$                            | 363K, 98% RH | This work  |
| MOF-801@PP-60                                                 | $1.84 \times 10^{-3}$                            | 325K, 98% RH | 7s         |
| H <sub>3</sub> PO <sub>4</sub> @Ni-BDC-PAN                    | $1.05 \times 10^{-2}$                            | 353K, 90% RH | 8s         |
| <b>1@PVA-10</b>                                               | $2.78 \times 10^{-4}$                            | 353K, 98% RH | 9s         |
| JUC-200@PVA-10                                                | $1.25 \times 10^{-3}$                            | 323K, 97% RH | 10s        |
| Zn-MOF-NH <sub>3</sub> /Nafion-5                              | $2.13 \times 10^{-2}$                            | 353K, 98%RH  | 11s        |
| Naf-1SZM                                                      | $2.96 \times 10^{-3}$                            | 353K, 35%RH  | 12s        |
| N_U200-10                                                     | $1.10 \times 10^{-2}$                            | 355K, 50% RH | 13s        |
| UiO-66-NH <sub>2</sub> + UiO-66-SO <sub>3</sub> H/ Nafion-0.6 | $2.56 \times 10^{-1}$                            | 363K, 95%RH  | 14s        |
| IL-COF-SO <sub>3</sub> H@SNF-35                               | $2.24 \times 10^{-1}$                            | 363K, 100%RH | 15s        |

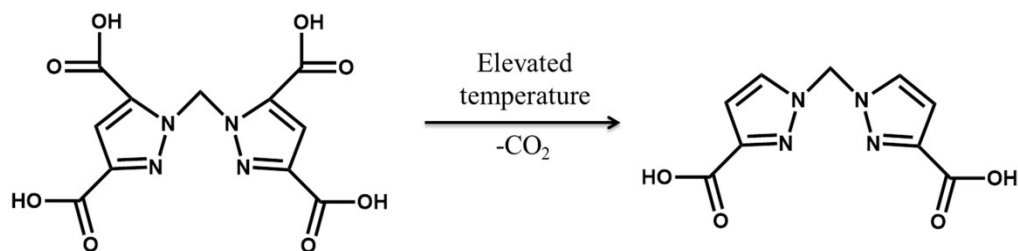

**Figure S1.** Decarboxylation of H<sub>4</sub>DBPZ taking place and transformation to H<sub>2</sub>DBPZ at elevated temperature.

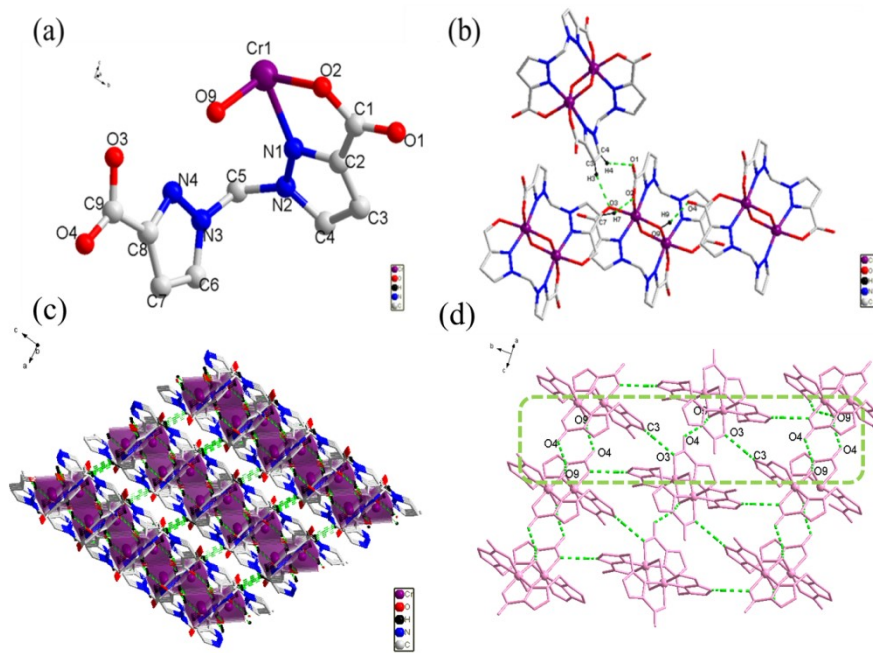

**Figure S2.** (a) The asymmetric unit of **1**; (b) Four kind of hydrogen-bonds of **1**; (c) The three-dimensional supramolecular network structure of **1**; (d) Hydrogen bonds in three-dimensional structure of **1**.

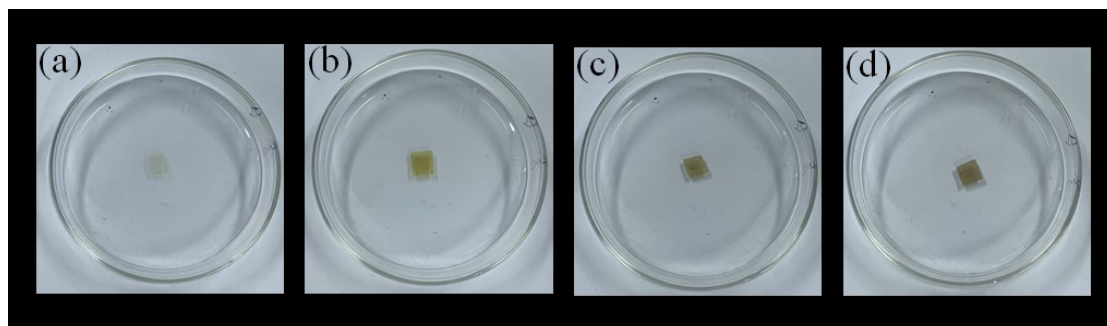

**Figure S3.** Photographic images of (a) pure CS/PVP, (b) **1**@CS/PVP-5%, (c) **1**@CS/PVP-10%, (d) **1**@CS/PVP-15%.

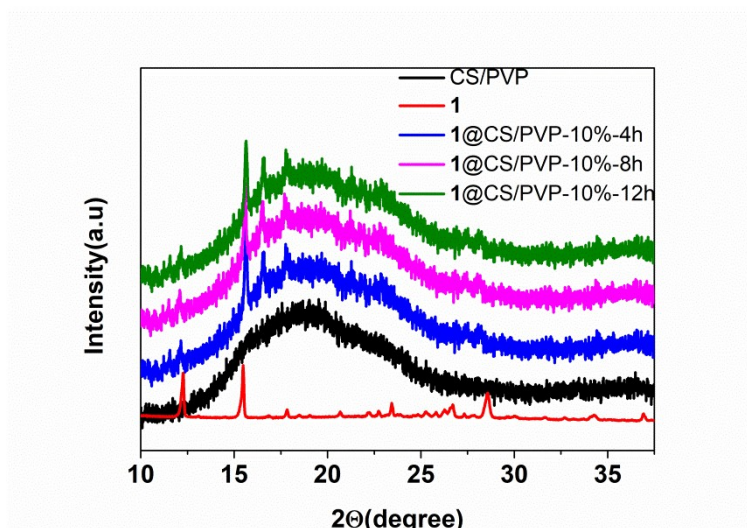

**Figure S4.** XRD patterns of 1@CS/PVP-10% treated with water at different periods of time.

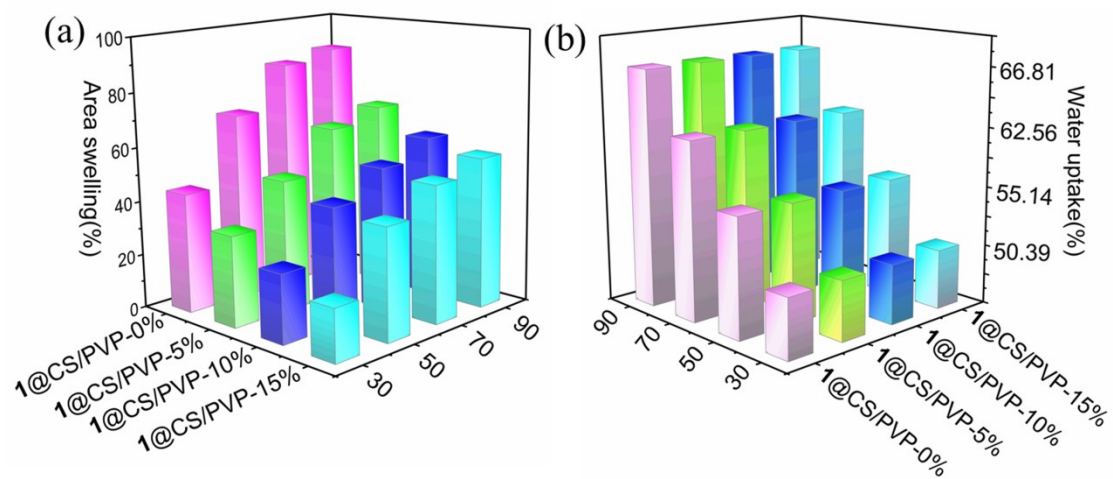

**Figure S5.** Area swelling and water uptake of 1@CS/PVP-0%, 1@CS/PVP-5%, 1@CS/PVP-10%, and 1@CS/PVP-15%.

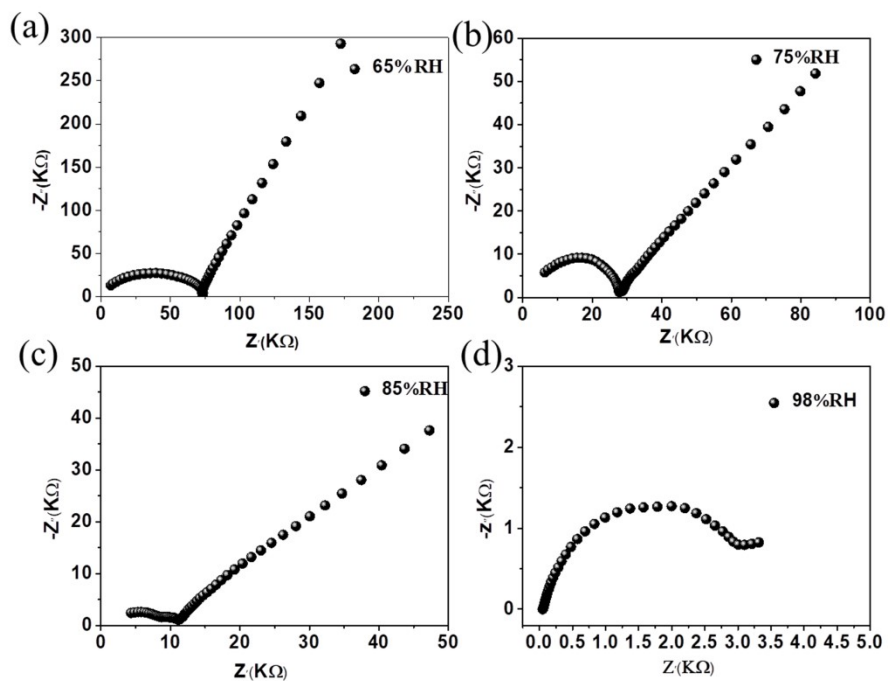

**Figure S6.** Nyquist plots of **1** at different relative humidity and 299 K

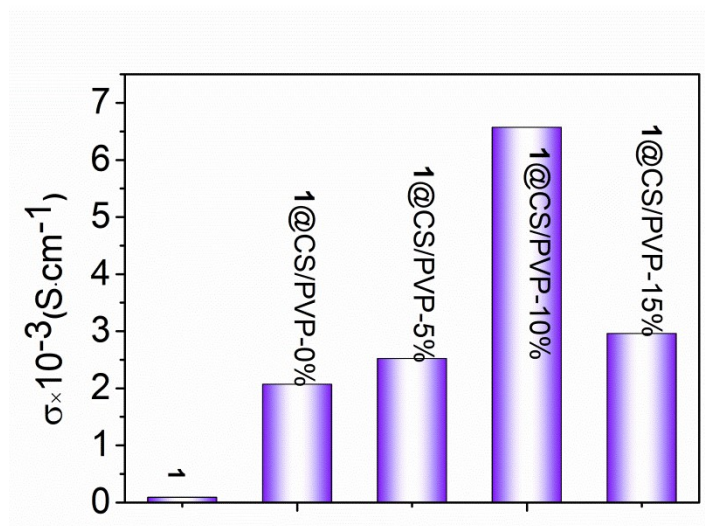

**Figure S7.** The proton conductivity of **1@CS/PVP-X** at 98% RH and 299 K

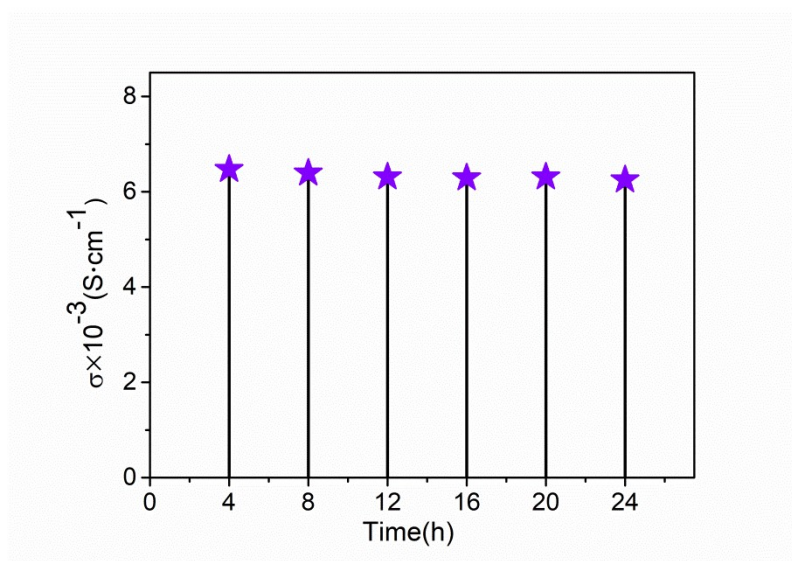

**Figure S8.** Proton conductivities of **1@CS/PVP-10%** measured at 299 K under 98% RH for 24 h;

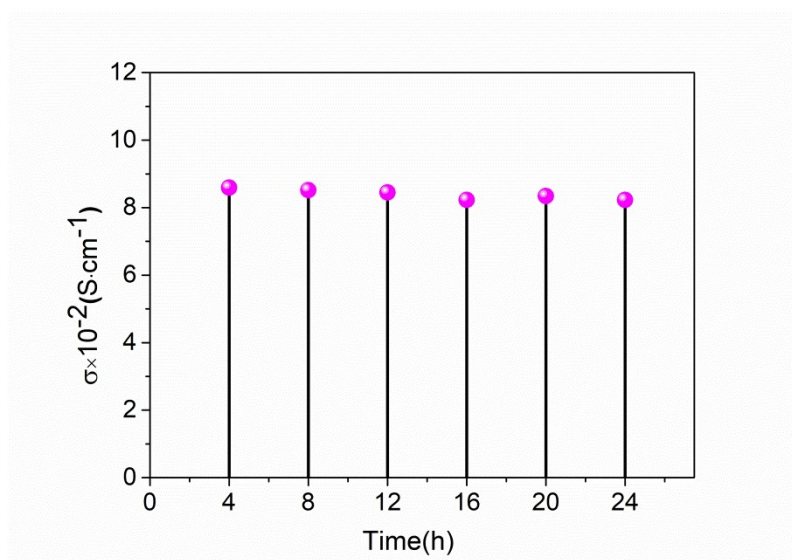

**Figure S9.** Proton conductivities of **1@CS/PVP-10%** measured at 363 K under 98% RH for 24 h;

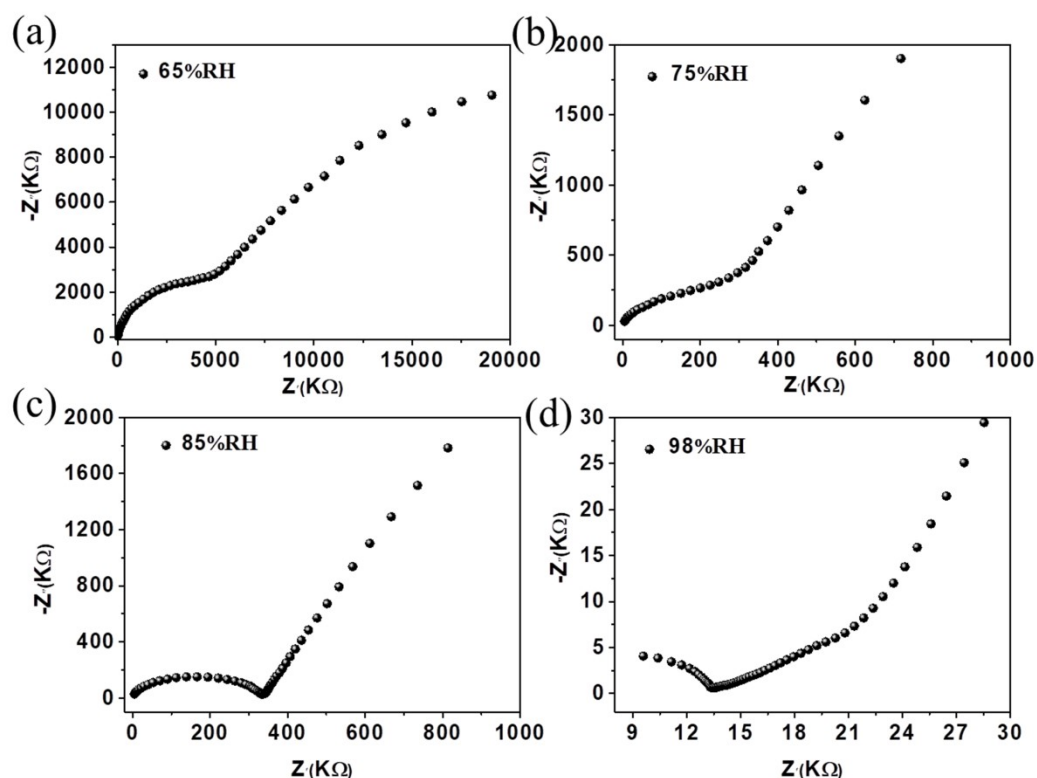

**Figure S10.** Nyquist plots of 1@CS/PVP-10 at different relative humidity and 299 K

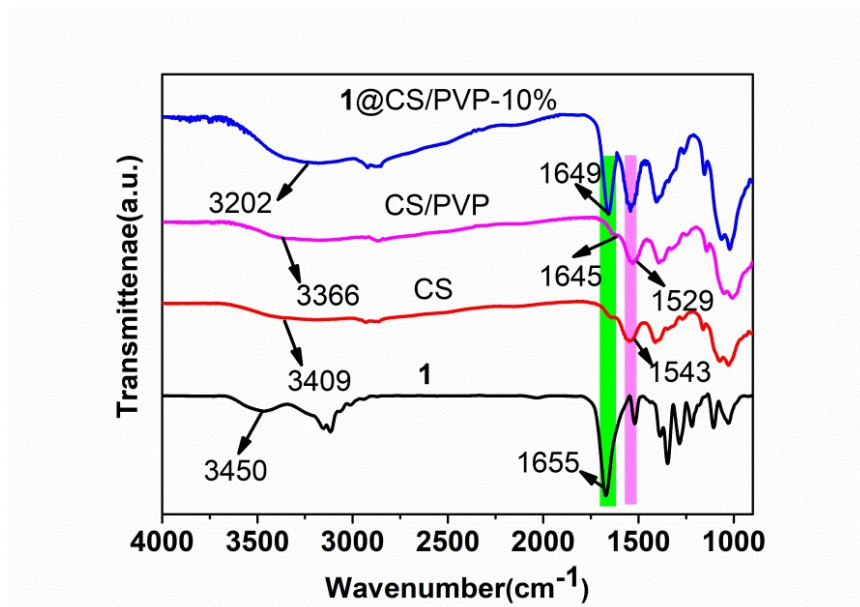

**Figure S11.** ATR-FT-IR spectra of 1, CS, CS/PVP and 1@CS/PVP-10%

## NOTES AND REFERENCE

1. W. Chen, L. Zhao, S. Yu, Z. Li, J. Feng and G. Li, *Polyhedron*, 2018, **148**, 100-108.
2. W.-H. Wang, Q. Gao, A.-L. Li, Y.-Y. Jia, S.-Y. Zhang, J.-H. Wang, Y.-H. Zhang and X.-H. Bu,



- Chinese Chemical Letters*, 2018, **29**, 336-338.
3. S. Chand, S. C. Pal, A. Pal, Y. Ye, Q. Lin, Z. Zhang, S. Xiang and M. C. Das, *Chemistry – A European Journal*, 2019, **25**, 1691-1695.
  4. W. W. Zhang, Y. L. Wang, Q. Liu and Q. Y. Liu, *Inorganic chemistry*, 2018, **57**, 7805-7814.
  5. J.-M. Li, T.-Y. Xu, Y.-L. Zhao, X.-L. Hu and K.-H. He, *Dalton transactions*, 2021, **50**, 7484-7495.
  6. M. Kloda, T. Plecháček, S. Ondrušová, P. Brázda, P. Chalupský, J. Rohlíček, J. Demel and J. Hynek, *Inorganic chemistry*, 2022, **61**, 7506-7512.
  7. J. Zhang, H.-J. Bai, Q. Ren, H.-B. Luo, X.-M. Ren, Z.-F. Tian and S. Lu, *ACS applied materials & interfaces*, 2018, **10**, 28656-28663.
  8. Z. Bai, S. Liu, G. Cheng, G. Wu and Y. Liu, *Microporous and Mesoporous Materials*, 2020, **292**, 109763.
  9. S.-F. Zhou, G.-M. Wu, T. Lin, C.-X. Zhang and Q.-L. Wang, *CrystEngComm*, 2020, **22**, 2013-2019.
  10. K. Cai, F. Sun, X. Liang, C. Liu, N. Zhao, X. Zou and G. Zhu, *Journal of Materials Chemistry A*, 2017, **5**, 12943-12950.
  11. H. Wang, Y. Zhao, Z. Shao, W. Xu, Q. Wu, X. Ding and H. Hou, *ACS applied materials & interfaces*, 2021, **13**, 7485-7497.
  12. A. Donnadio, R. Narducci, M. Casciola, F. Marmottini, R. D'Amato, M. Jazestani, H. Chiniforoshan and F. Costantino, *ACS applied materials & interfaces*, 2017, **9**, 42239-42246.
  13. H. A. Patel, N. Mansor, S. Gadipelli, D. J. L. Brett and Z. Guo, *ACS applied materials & interfaces*, 2016, **8**, 30687-30691.
  14. Z. Rao, B. Tang and P. Wu, *ACS applied materials & interfaces*, 2017, **9**, 22597-22603.
  15. P. Li, J. Chen and S. Tang, *Chemical Engineering Journal*, 2021, **415**, 129021.
